# Supplementary material for: The nasal cavity microbiota of healthy adults
Source: Microbiome. 2014 Aug 11;2:27. doi: 10.1186/2049-2618-2-27 (PMC4138944; doi:10.1186/2049-2618-2-27)
Supplement: Additional file 2: Table S2 — Relative abundances of bacterial families in each sample based on classification of 16S rRNA-encoding gene sequence reads. [file 2049-2618-2-27-S2.pdf]

Supplemental Table 2

| Supplemental Table 2                |       |       |       |       |       |       |       |       |       |       |       |       |       |       |       |               |       |       |       |       |       |       |       |       |       |       |       |       |       |       |      |      |      |      |       |      |      |
|-------------------------------------|-------|-------|-------|-------|-------|-------|-------|-------|-------|-------|-------|-------|-------|-------|-------|---------------|-------|-------|-------|-------|-------|-------|-------|-------|-------|-------|-------|-------|-------|-------|------|------|------|------|-------|------|------|
| Nasal Cavity                        |       |       |       |       |       |       |       |       |       |       |       |       |       |       |       | Buccal Mucosa |       |       |       |       |       |       |       |       |       |       |       |       |       |       |      |      |      |      |       |      |      |
|                                     | A     | B     | C     | D     | E     | F     | G     | H     | I     | J     |       |       | A     | B     | C     | D             | E     | F     | G     | H     | I     | J     |       |       | A     | B     | C     | D     | E     | F     | G    | H    | I    | J    |       |      |      |
| <b>Actinobacteria</b>               |       |       |       |       |       |       |       |       |       |       |       |       |       |       |       |               |       |       |       |       |       |       |       |       |       |       |       |       |       |       |      |      |      |      |       |      |      |
| Corynebacteriaceae                  | 4.3%  | 14.1% | 1.5%  | 63.3% | 60.6% | 4.8%  | 3.7%  | 55.4% | 4.1%  | 62.8% | 0.0%  | 0.0%  | 0.0%  | 0.0%  | 1.2%  | 0.4%          | 0.0%  | 0.0%  | 0.0%  | 0.0%  | 0.0%  | 0.0%  | 0.0%  | 0.0%  | 0.0%  | 0.0%  | 0.0%  | 0.0%  | 0.0%  | 0.0%  | 0.0% | 0.0% | 0.0% | 0.0% | 0.0%  | 0.0% |      |
| Propionibacteriaceae                | 16.6% | 14.1% | 0.4%  | 1.5%  | 23.2% | 18.6% | 42.4% | 3.3%  | 13.8% | 0.7%  | 0.0%  | 0.0%  | 0.0%  | 0.0%  | 0.0%  | 0.0%          | 0.0%  | 0.0%  | 0.0%  | 0.4%  | 0.4%  | 0.0%  | 0.0%  | 0.0%  | 0.0%  | 0.4%  | 0.4%  | 0.0%  | 0.0%  | 0.0%  | 0.0% | 0.0% | 0.4% | 0.0% | 0.0%  | 0.0% |      |
| Actinomycetaceae                    | 1.5%  | 1.1%  | 1.0%  | 0.4%  | 1.4%  | 0.7%  | 0.4%  | 0.0%  | 0.0%  | 0.0%  | 1.5%  | 0.4%  | 0.0%  | 3.0%  | 3.3%  | 4.5%          | 1.0%  | 0.0%  | 1.0%  | 0.0%  | 0.7%  | 7.8%  | 1.0%  | 0.0%  | 0.0%  | 0.0%  | 0.0%  | 0.0%  | 0.0%  | 0.0%  | 0.0% | 0.0% | 1.0% | 7.4% | 10.8% | 4.8% | 0.7% |
| Micrococccaceae                     | 0.4%  | 0.0%  | 0.0%  | 0.7%  | 0.0%  | 0.0%  | 0.4%  | 0.4%  | 0.0%  | 0.0%  | 2.2%  | 14.1% | 0.0%  | 1.9%  | 0.0%  | 1.9%          | 1.6%  | 1.6%  | 0.4%  | 0.4%  | 1.6%  | 1.9%  | 0.0%  | 6.7%  | 0.7%  | 1.5%  | 2.6%  | 1.5%  | 3.7%  | 4.5%  | 1.3% |      |      |      |       |      |      |
| Other                               | 1.0%  | 1.1%  | 0.4%  | 1.2%  | 0.4%  | 0.0%  | 1.9%  | 0.0%  | 10.8% | 0.0%  | 0.4%  | 0.0%  | 0.0%  | 0.0%  | 2.6%  | 0.4%          | 0.7%  | 0.4%  | 0.0%  | 0.0%  | 0.0%  | 0.0%  | 0.0%  | 0.0%  | 2.2%  | 0.0%  | 0.0%  | 2.6%  | 0.0%  | 1.5%  | 0.4% | 0.4% | 0.0% | 0.0% |       |      |      |
| <b>Bacteroidetes</b>                |       |       |       |       |       |       |       |       |       |       |       |       |       |       |       |               |       |       |       |       |       |       |       |       |       |       |       |       |       |       |      |      |      |      |       |      |      |
| Flavobacteriaceae                   | 3.7%  | 0.7%  | 1.7%  | 0.7%  | 1.1%  | 1.5%  | 0.7%  | 1.1%  | 0.0%  | 0.0%  | 1.1%  | 1.1%  | 0.0%  | 6.1%  | 11.9% | 1.7%          | 2.3%  | 1.0%  | 0.0%  | 1.9%  | 7.4%  | 37.1% | 8.6%  | 18.6% | 21.4% | 3.3%  | 34.9% | 17.6% | 1.5%  | 1.3%  |      |      |      |      |       |      |      |
| Flavobacteriaceae                   | 4.8%  | 1.0%  | 0.0%  | 0.7%  | 0.0%  | 0.7%  | 2.2%  | 0.0%  | 0.4%  | 0.0%  | 0.4%  | 0.0%  | 0.4%  | 0.0%  | 2.2%  | 4.8%          | 3.0%  | 0.4%  | 0.4%  | 0.0%  | 0.0%  | 0.0%  | 0.4%  | 0.4%  | 0.4%  | 0.0%  | 0.4%  | 1.1%  | 0.0%  | 0.0%  | 0.0% | 0.0% | 0.0% | 0.0% | 0.0%  |      |      |
| Porphyromonadaceae                  | 1.1%  | 0.0%  | 0.4%  | 0.0%  | 0.0%  | 0.4%  | 0.0%  | 0.0%  | 0.0%  | 0.0%  | 1.1%  | 1.1%  | 0.0%  | 0.7%  | 0.7%  | 1.9%          | 2.4%  | 1.5%  | 0.0%  | 0.4%  | 2.2%  | 1.9%  | 0.7%  | 0.4%  | 0.0%  | 1.1%  | 4.1%  | 1.1%  | 0.0%  | 0.0%  | 0.0% | 0.0% | 0.0% | 0.0% | 0.0%  |      |      |
| Other                               | 0.0%  | 0.0%  | 1.1%  | 0.0%  | 0.0%  | 0.7%  | 0.0%  | 0.0%  | 0.0%  | 0.0%  | 0.4%  | 0.0%  | 1.5%  | 0.0%  | 0.4%  | 0.4%          | 0.0%  | 0.0%  | 0.0%  | 0.0%  | 0.0%  | 0.0%  | 1.1%  | 0.7%  | 0.0%  | 0.7%  | 2.2%  | 1.9%  | 1.1%  | 0.4%  | 0.0% |      |      |      |       |      |      |
| <b>Firmicutes</b>                   |       |       |       |       |       |       |       |       |       |       |       |       |       |       |       |               |       |       |       |       |       |       |       |       |       |       |       |       |       |       |      |      |      |      |       |      |      |
| Streptococcaceae                    | 16.0% | 1.1%  | 53.2% | 1.1%  | 6.3%  | 3.7%  | 11.9% | 1.1%  | 27.0% | 0.7%  | 79.2% | 54.3% | 87.4% | 29.7% | 41.1% | 30.5%         | 50.2% | 34.6% | 79.2% | 67.7% | 18.0% | 16.7% | 33.1% | 26.8% | 34.6% | 24.9% | 8.9%  | 26.0% | 37.5% | 62.9% |      |      |      |      |       |      |      |
| Weissellaceae                       | 8.9%  | 0.0%  | 1.9%  | 0.7%  | 3.7%  | 1.1%  | 0.4%  | 0.4%  | 0.7%  | 0.0%  | 2.6%  | 2.7%  | 0.0%  | 7.4%  | 0.9%  | 9.3%          | 11.9% | 17.5% | 0.0%  | 2.3%  | 8.2%  | 21.4% | 8.2%  | 22.3% | 17.5% | 7.8%  | 21.4% | 16.4% | 15.2% | 4.5%  |      |      |      |      |       |      |      |
| Sphingomonadaceae                   | 5.2%  | 55.0% | 4.1%  | 4.5%  | 2.2%  | 47.8% | 3.3%  | 37.5% | 14.9% | 23.0% | 0.0%  | 0.0%  | 0.0%  | 0.0%  | 0.0%  | 0.0%          | 0.0%  | 0.0%  | 0.0%  | 0.0%  | 0.0%  | 0.0%  | 0.0%  | 0.0%  | 0.0%  | 0.0%  | 0.0%  | 0.0%  | 0.0%  | 0.0%  | 0.0% | 0.0% | 0.0% | 0.0% | 0.0%  | 0.0% |      |
| Bacillus Family XI Incertae Sedis   | 0.0%  | 0.0%  | 0.0%  | 0.0%  | 0.0%  | 1.5%  | 0.0%  | 0.0%  | 0.0%  | 0.0%  | 0.0%  | 7.8%  | 1.1%  | 4.1%  | 0.0%  | 6.7%          | 3.0%  | 1.5%  | 2.3%  | 1.1%  | 0.0%  | 1.5%  | 0.7%  | 0.0%  | 3.3%  | 0.7%  | 2.6%  | 0.4%  | 0.0%  | 0.0%  | 0.0% | 0.0% | 0.0% | 0.0% | 0.0%  | 0.0% |      |
| Unclassified Lactobacillales        | 0.0%  | 0.0%  | 0.0%  | 0.0%  | 0.0%  | 0.0%  | 1.1%  | 0.0%  | 0.4%  | 0.0%  | 0.7%  | 1.5%  | 0.0%  | 1.5%  | 1.1%  | 4.8%          | 3.0%  | 4.1%  | 1.1%  | 0.0%  | 2.2%  | 1.5%  | 4.1%  | 0.4%  | 0.4%  | 5.9%  | 1.5%  | 5.9%  | 7.1%  | 4.4%  |      |      |      |      |       |      |      |
| Lactococcaceae                      | 1.5%  | 0.7%  | 1.9%  | 0.0%  | 1.1%  | 0.0%  | 1.1%  | 0.0%  | 0.7%  | 0.0%  | 0.0%  | 0.7%  | 0.0%  | 1.1%  | 1.5%  | 3.0%          | 0.4%  | 2.6%  | 0.0%  | 0.7%  | 2.2%  | 6.7%  | 0.4%  | 2.6%  | 4.8%  | 2.2%  | 2.6%  | 2.2%  | 1.5%  | 0.0%  | 0.0% | 0.0% | 0.0% | 0.0% | 0.0%  |      |      |
| Clostridia Family XI Incertae Sedis | 0.4%  | 0.0%  | 0.0%  | 1.1%  | 0.0%  | 3.0%  | 3.7%  | 10.4% | 4.8%  | 0.0%  | 0.0%  | 0.0%  | 0.0%  | 0.4%  | 1.0%  | 0.0%          | 0.0%  | 0.4%  | 0.4%  | 0.0%  | 0.0%  | 0.4%  | 0.0%  | 0.4%  | 0.0%  | 0.4%  | 0.0%  | 0.0%  | 0.0%  | 0.4%  | 0.0% | 0.4% | 0.0% | 0.4% | 0.0%  |      |      |
| Paenibacillaceae                    | 0.0%  | 0.0%  | 17.5% | 0.0%  | 0.0%  | 0.0%  | 0.0%  | 0.0%  | 4.1%  | 0.0%  | 0.0%  | 0.4%  | 0.0%  | 0.7%  | 0.4%  | 0.0%          | 0.0%  | 0.0%  | 0.0%  | 0.7%  | 0.0%  | 1.1%  | 0.0%  | 0.0%  | 0.0%  | 0.0%  | 0.0%  | 0.0%  | 0.0%  | 0.0%  | 0.0% | 0.0% | 0.0% | 0.0% | 0.0%  | 0.0% |      |
| Carobacteriaceae                    | 0.0%  | 0.4%  | 0.0%  | 16.4% | 0.0%  | 0.0%  | 0.4%  | 0.0%  | 0.0%  | 3.7%  | 0.0%  | 0.0%  | 0.0%  | 0.4%  | 0.0%  | 0.0%          | 0.0%  | 0.0%  | 0.0%  | 0.4%  | 0.0%  | 0.0%  | 0.0%  | 0.0%  | 0.0%  | 0.0%  | 0.0%  | 0.0%  | 0.0%  | 0.4%  | 0.0% | 0.4% | 0.0% | 0.4% | 0.0%  |      |      |
| Other                               | 1.1%  | 0.0%  | 1.9%  | 0.0%  | 2.4%  | 0.0%  | 0.4%  | 0.0%  | 2.2%  | 0.0%  | 0.4%  | 0.4%  | 0.0%  | 7.1%  | 2.2%  | 0.4%          | 0.0%  | 0.4%  | 0.0%  | 1.1%  | 0.4%  | 1.5%  | 0.0%  | 1.1%  | 5.2%  | 0.4%  | 1.1%  | 5.2%  | 0.4%  | 1.1%  | 0.7% | 0.4% | 0.4% | 0.0% | 0.0%  |      |      |
| <b>Fusobacteria</b>                 |       |       |       |       |       |       |       |       |       |       |       |       |       |       |       |               |       |       |       |       |       |       |       |       |       |       |       |       |       |       |      |      |      |      |       |      |      |
| Fusobacteriaceae                    | 1.1%  | 0.0%  | 0.0%  | 0.0%  | 0.0%  | 0.4%  | 0.0%  | 0.0%  | 0.0%  | 0.0%  | 1.5%  | 0.4%  | 0.0%  | 4.8%  | 0.7%  | 9.3%          | 2.6%  | 0.7%  | 0.4%  | 2.6%  | 1.9%  | 2.6%  | 3.0%  | 7.1%  | 0.0%  | 12.3% | 7.4%  | 0.7%  | 1.1%  | 4.1%  |      |      |      |      |       |      |      |
| Leptotrichaceae                     | 6.4%  | 0.0%  | 0.7%  | 0.0%  | 0.7%  | 0.0%  | 0.4%  | 0.0%  | 0.0%  | 0.0%  | 0.0%  | 0.0%  | 0.0%  | 0.4%  | 0.0%  | 2.2%          | 0.4%  | 2.3%  | 0.0%  | 0.0%  | 1.9%  | 0.0%  | 0.0%  | 1.9%  | 0.0%  | 1.9%  | 3.0%  | 1.0%  | 0.4%  | 0.0%  | 0.0% | 0.0% | 0.0% | 0.0% | 0.0%  |      |      |
| <b>Proteobacteria</b>               |       |       |       |       |       |       |       |       |       |       |       |       |       |       |       |               |       |       |       |       |       |       |       |       |       |       |       |       |       |       |      |      |      |      |       |      |      |
| <b>Betaproteobacteria</b>           |       |       |       |       |       |       |       |       |       |       |       |       |       |       |       |               |       |       |       |       |       |       |       |       |       |       |       |       |       |       |      |      |      |      |       |      |      |
| Neisseriaceae                       | 2.2%  | 0.7%  | 0.7%  | 0.0%  | 0.0%  | 11.9% | 0.0%  | 0.4%  | 13.4% | 0.0%  | 2.2%  | 1.3%  | 1.1%  | 13.3% | 0.7%  | 8.9%          | 0.0%  | 1.7%  | 0.0%  | 0.0%  | 10.8% | 8.2%  | 17.5% | 3.9%  | 0.0%  | 21.9% | 0.0%  | 1.3%  | 1.5%  | 0.0%  |      |      |      |      |       |      |      |
| Comamonadaceae                      | 13.0% | 2.2%  | 1.5%  | 1.1%  | 0.4%  | 1.5%  | 10.8% | 0.0%  | 0.0%  | 0.0%  | 0.0%  | 0.0%  | 0.0%  | 0.0%  | 0.0%  | 0.0%          | 0.0%  | 0.0%  | 0.0%  | 0.0%  | 0.0%  | 0.0%  | 0.0%  | 0.0%  | 0.0%  | 0.0%  | 0.0%  | 0.0%  | 0.0%  | 0.0%  | 0.0% | 0.0% | 0.0% | 0.0% | 0.0%  | 0.0% |      |
| Bacteroidetes Incertae Sedis        | 8.2%  | 1.1%  | 1.0%  | 0.4%  | 1.4%  | 0.4%  | 5.9%  | 0.0%  | 0.7%  | 0.0%  | 0.4%  | 0.0%  | 0.0%  | 0.0%  | 0.0%  | 0.0%          | 0.0%  | 0.0%  | 0.0%  | 0.4%  | 0.0%  | 0.0%  | 0.0%  | 0.0%  | 0.0%  | 0.0%  | 0.0%  | 0.0%  | 0.0%  | 0.0%  | 0.0% | 0.0% | 0.0% | 0.0% | 0.0%  | 0.0% |      |
| Other                               | 0.0%  | 0.4%  | 0.0%  | 0.4%  | 0.0%  | 0.0%  | 0.4%  | 0.0%  | 0.0%  | 0.0%  | 0.4%  | 0.0%  | 0.0%  | 1.5%  | 0.0%  | 0.0%          | 0.0%  | 1.5%  | 0.0%  | 0.0%  | 0.0%  | 0.0%  | 0.0%  | 0.0%  | 0.0%  | 0.0%  | 0.0%  | 0.0%  | 0.0%  | 0.0%  | 0.0% | 0.0% | 0.0% | 0.0% | 0.0%  | 0.0% |      |
| <b>Gamma-proteobacteria</b>         |       |       |       |       |       |       |       |       |       |       |       |       |       |       |       |               |       |       |       |       |       |       |       |       |       |       |       |       |       |       |      |      |      |      |       |      |      |
| Pasteurellaceae                     | 0.0%  | 0.0%  | 0.4%  | 0.0%  | 0.0%  | 1.9%  | 1.9%  | 0.0%  | 0.7%  | 0.0%  | 6.3%  | 11.2% | 10.4% | 11.5% | 0.4%  | 8.2%          | 13.4% | 17.5% | 16.4% | 0.4%  | 3.7%  | 3.7%  | 5.9%  | 2.6%  | 0.0%  | 5.9%  | 7.8%  | 5.3%  | 23.0% | 0.0%  |      |      |      |      |       |      |      |
| Moraxellaceae                       | 1.5%  | 0.0%  | 1.1%  | 1.1%  | 0.4%  | 0.0%  | 4.5%  | 0.0%  | 0.4%  | 0.0%  | 0.0%  | 0.0%  | 0.0%  | 1.1%  | 0.0%  | 0.0%          | 0.0%  | 0.0%  | 0.0%  | 0.0%  | 29.0% | 0.0%  | 0.0%  | 0.0%  | 0.0%  | 0.0%  | 0.0%  | 0.0%  | 0.0%  | 0.0%  | 0.0% | 0.0% | 0.0% | 0.0% | 0.0%  | 0.0% |      |
| Other                               | 2.6%  | 0.4%  | 1.9%  | 0.0%  | 0.0%  | 0.4%  | 0.4%  | 0.0%  | 0.0%  | 0.0%  | 0.0%  | 0.0%  | 0.0%  | 0.0%  | 0.0%  | 0.0%          | 0.0%  | 0.0%  | 0.0%  | 0.0%  | 0.0%  | 0.0%  | 0.0%  | 0.0%  | 0.0%  | 0.0%  | 0.0%  | 0.0%  | 0.0%  | 0.0%  | 0.0% | 0.0% | 0.0% | 0.0% | 0.0%  | 0.0% |      |
| <b>Other Proteobacteria</b>         | 1.5%  | 0.0%  | 0.0%  | 0.4%  | 0.4%  | 1.5%  | 0.0%  | 0.0%  | 0.0%  | 0.0%  | 0.0%  | 0.0%  | 0.0%  | 0.0%  | 0.4%  | 0.0%          | 0.0%  | 0.0%  | 0.0%  | 0.4%  | 0.0%  | 0.0%  | 0.0%  | 0.0%  | 0.0%  | 0.4%  | 0.0%  | 0.0%  | 0.0%  | 0.4%  | 0.0% | 0.0% | 0.0% | 0.0% | 0.0%  |      |      |
| <b>Other Phyla</b>                  | 0.4%  | 0.7%  | 0.0%  | 0.4%  | 0.0%  | 0.0%  | 0.0%  | 0.0%  | 0.0%  | 0.0%  | 0.0%  | 0.0%  | 0.0%  | 0.4%  | 0.0%  | 0.4%          | 0.0%  | 0.0%  | 0.0%  | 0.7%  | 0.4%  | 0.4%  | 0.0%  | 0.0%  | 0.4%  | 0.0%  | 0.4%  | 0.0%  | 0.0%  | 0.4%  | 0.0% | 0.0% | 0.0% | 0.0% | 0.0%  |      |      |
